# Supplementary material for: Effect of sulphur vacancy on geometric and electronic structure of MoS2 induced by molecular hydrogen treatment at room temperature
Source: Royal Society of Chemistry journal article supplement (doi:10.1039/c3ra42072h), 2013-01-01
Supplement: c3ra42072h.pdf [file c3ra42072h.pdf]

## Supplementary Information

### Effect of Sulfur Vacancy on Geometric and Electronic Structures of MoS<sub>2</sub> Induced by Molecular Hydrogen Treatment at Room Temperature

Byung Hoon Kim,<sup>†,§,‡</sup> Min Park,<sup>#,‡</sup> Minoh Lee,<sup>†</sup> Seung Jae Baek,<sup>#</sup> Hu Young Jung,<sup>†</sup> Min Choi,<sup>†</sup> Sung Jin Chang,<sup>¶</sup> Won G. Hong,<sup>¶</sup> Tae Kyung Kim,<sup>†</sup> Hoi Ri Moon,<sup>†</sup> Yung Woo Park,<sup>#</sup> Noejung Park,<sup>†,\*</sup> and Yongseok Jun<sup>†,\*</sup>

<sup>†</sup>Interdisciplinary School of Green Energy, KIER-UNIST Advanced Center for Energy, Ulsan National Institute of Science and Technology (UNIST), Ulsan 689-798, Republic of Korea,

<sup>§</sup>Department of Physics, Incheon National University, Incheon 406-772, Republic of Korea,

<sup>#</sup>Department of Physics and Astronomy and Department of Nano Science and Technology, Seoul National University, Seoul 151-747, Republic of Korea,

<sup>†</sup>UNIST Central Research Facility and School of Mechanical and Advanced Materials Engineering, Ulsan National Institute of Science and Technology (UNIST), Ulsan 689-798, Republic of Korea,

<sup>¶</sup>Division of Materials Science, Korea Basic Science Institute, Daejeon 305-806, Republic of Korea.

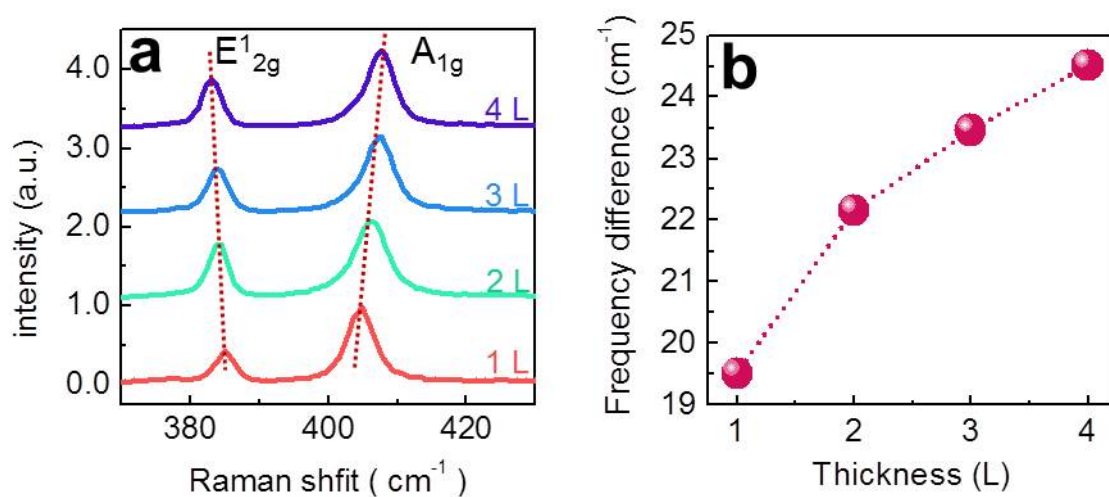

**Figure S1.** (a) The number of layer dependence of Raman spectra. (b) As the thickness increases, the frequency difference between E<sub>2g</sub><sup>1</sup> and A<sub>1g</sub> increases from 19.5 to 24.5 cm<sup>-1</sup>. It is consistent with the previous literature.<sup>S1-S2</sup>

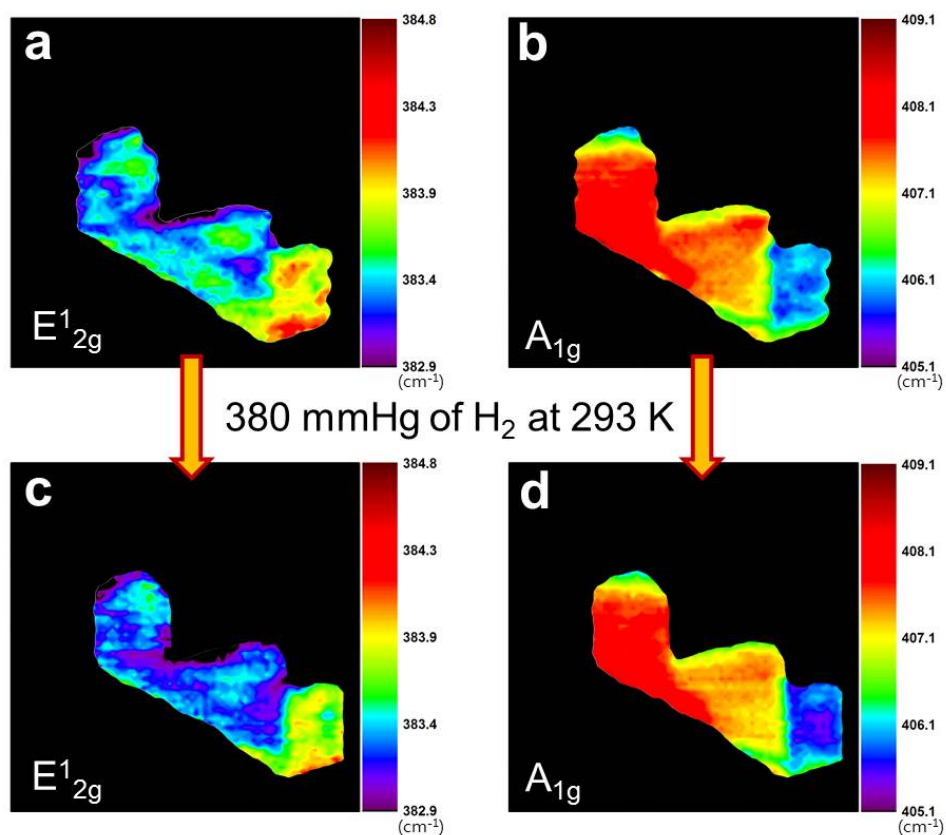

**Figure S2.** The red-shift of Raman spectra after exposure to 380 mmHg of H<sub>2</sub> at room temperature. First, we prepared the chamber for Raman study in vacuum. Second, we obtained (a), E<sub>2g</sub><sup>1</sup> and (b), A<sub>1g</sub> peaks in vacuum and finally the both peaks were extracted after H<sub>2</sub> exposure. (c) and (d), The red-shift occurred in both peaks.

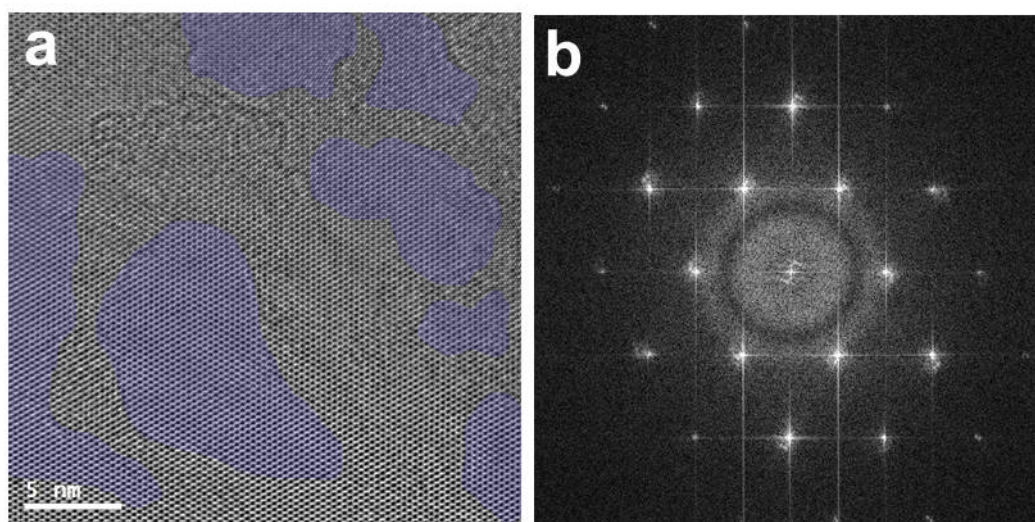

**Figure S3.** TEM study of multilayer MoS<sub>2</sub>. (a) TEM image of the surface shows that several pieces of additional layers were attached on the main layer. The coloured parts indicate the even surface of the main layer. (b) ED pattern of the TEM image.

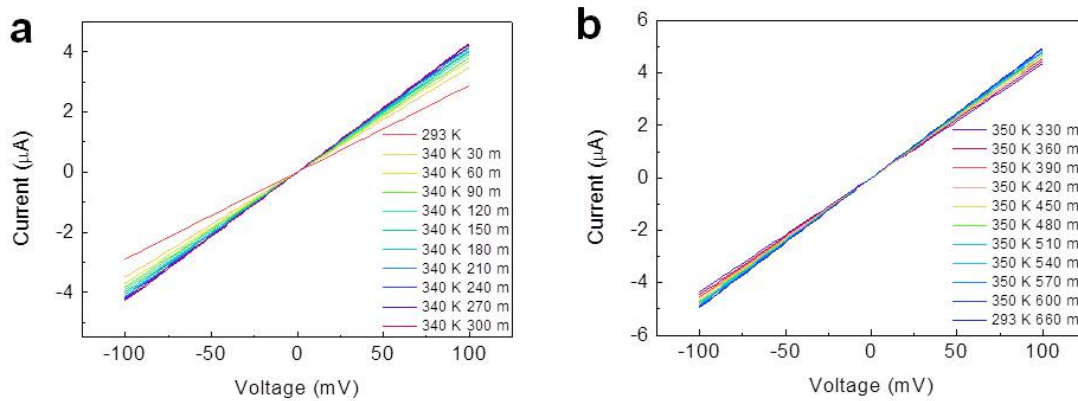

**Figure S4.** Temperature-dependent electrical transport properties of MoS<sub>2</sub> in high H<sub>2</sub> pressure from 293 K to 350 K. (a) and (b) *I-V* characteristics.

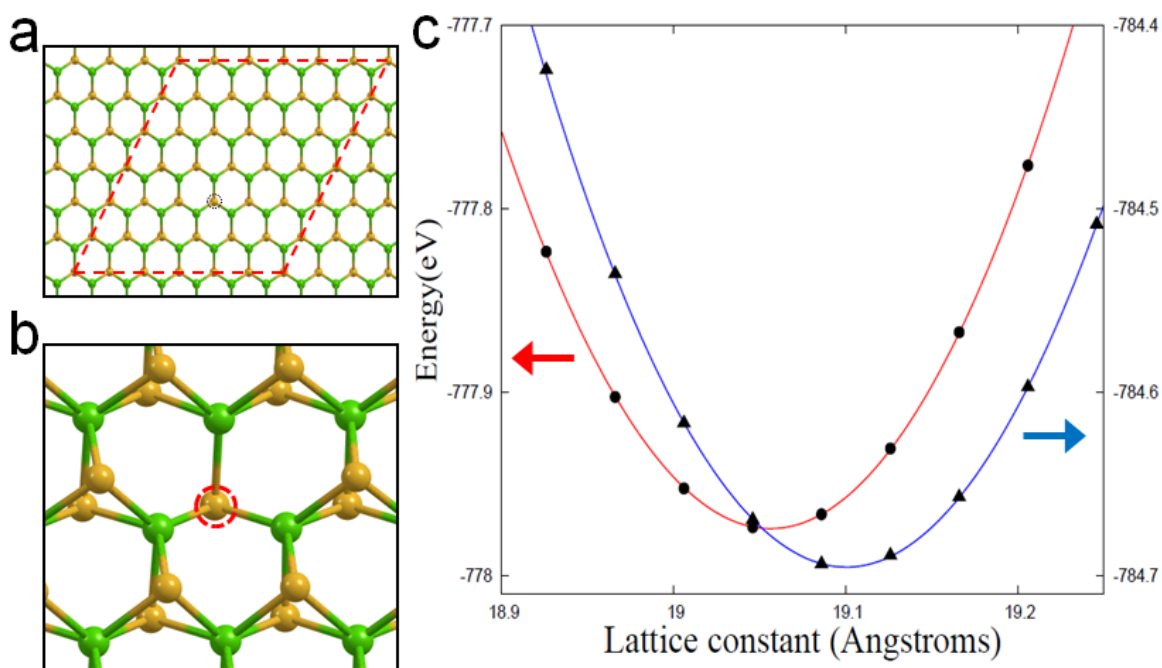

**Figure S5.** Structure and lattice length of pure single layer MoS<sub>2</sub> and that with sulfur vacancy per 6x6 supercell. (a) The geometry of the MoS<sub>2</sub> 6x6 supercell with one sulfur vacancy. (b) A zoomed-in view of the region of the sulfur vacancy. (c) Lattice constant of the triangular lattice of the 6x6 supercell of perfect MoS<sub>2</sub> (solid triangles) and that with one sulfur vacancy (solid circles).

## References

**S1.** Lee, C.; Yan, H.; Brus, L. E.; Heinz, T. F.; Hone, J.; Ryu, S., Anomalous Lattice Vibrations of Single- and Few-Layer MoS<sub>2</sub>. *ACS Nano* **2010**, *4*, 2695-2700.

**S2.** Li, H.; Zhang, Q.; Yap, C. C. R.; Tay, B. K.; Edwin, T. H. T.; Olivier, A.; Baillargeat, D., From Bulk to Monolayer MoS<sub>2</sub>: Evolution of Raman Scattering. *Adv. Funct. Mater.* **2012**, *22*, 1385-1390.
